# Supplementary material for: Paratubular basement membrane insudative lesions predict renal prognosis in patients with type 2 diabetes and biopsy-proven diabetic nephropathy
Source: PubMed Central journal article supplement (PMC5557586; doi:10.1371/journal.pone.0183190), 2017-08-15
Supplement: pone.0183190.s001.pdf [file pone.0183190.s001.pdf]

**S1 Table 1. Distribution of cortical and medullary PTBMIL grades.**

|                             | Cortex  | Medulla | Cortex + Medulla |         |
|-----------------------------|---------|---------|------------------|---------|
| Grade 0 (Absence of PTBMIL) | 10 (7)  | 7 (5)   | PTBMIL score 0   | 4 (3)   |
| Grade 1 (PTBMIL <25%)       | 27 (20) | 41 (30) | PTBMIL score 1   | 9 (7)   |
| Grade 2 (PTBMIL: 25-50%)    | 57 (42) | 50 (37) | PTBMIL score 2   | 21 (15) |
| Grade 3 (PTBMIL >50%)       | 42 (31) | 38 (28) | PTBMIL score 3   | 15 (11) |
|                             |         |         | PTBMIL score 4   | 35 (26) |
|                             |         |         | PTBMIL score 5   | 26 (19) |
|                             |         |         | PTBMIL score 6   | 26 (19) |

Number (%)

Abbreviations

PTBMIL: paratubular basement membrane insudative lesions
