# Supplementary material for: Paratubular basement membrane insudative lesions predict renal prognosis in patients with type 2 diabetes and biopsy-proven diabetic nephropathy
Source: PubMed Central journal article supplement (PMC5557586; doi:10.1371/journal.pone.0183190), 2017-08-15
Supplement: pone.0183190.s004.pdf [file pone.0183190.s004.pdf]

**S4 Table. Correlation coefficients of IFTA score and PTBMIL score with other pathologic findings.**

|              | IFTA score | PTBMIL score | Glomerular insudative lesion | Glomerular class | Interstitial inflammation score | Arteriolar hyalinosis score | Arteriosclerosis score |
|--------------|------------|--------------|------------------------------|------------------|---------------------------------|-----------------------------|------------------------|
| IFTA score   | -          | 0.57*        | 0.40*                        | 0.63*            | 0.33*                           | 0.31*                       | 0.32* (n=133)          |
| PTBMIL score | -          | -            | 0.29*                        | 0.40*            | 0.32*                           | 0.25*                       | 0.16 (n=133)           |

Abbreviations

IFTA: interstitial fibrosis and tubular atrophy, PTBMIL: paratubular basement membrane insudative lesions.

\*Significant correlation coefficient (*r*)
