# Supplementary material for: Paratubular basement membrane insudative lesions predict renal prognosis in patients with type 2 diabetes and biopsy-proven diabetic nephropathy
Source: PubMed Central journal article supplement (PMC5557586; doi:10.1371/journal.pone.0183190), 2017-08-15
Supplement: pone.0183190.s005.pdf [file pone.0183190.s005.pdf]

**S5 Table. Difference of systolic blood pressure, number of antihypertensive drug, and arteriosclerosis score among groups stratified according to IFTA scores in each PTBMIL group.**

| PTBMIL group 1 (n=34)               | IFTA score 0<br>(n=3) | IFTA score 1<br>(n=20) | IFTA score 2<br>(n=7)  | IFTA score 3<br>(n=4)  | <i>P</i> -for trend*         |
|-------------------------------------|-----------------------|------------------------|------------------------|------------------------|------------------------------|
| Systolic blood pressure (mmHg)      | 124 ± 16              | 141.6 ± 19.1           | 144.9 ± 15.0           | 158.0 ± 30.8           | 0.11                         |
| Number of antihypertensive drug (n) | 1.3 ± 1.5             | 2.1 ± 1.6              | 1.9 ± 0.9              | 3.0 ± 1.2              | 0.20                         |
| Average arteriosclerosis score      | 1.0 ± 0.8             | 1.1 ± 0.7              | 1.1 ± 0.7              | 1.7 ± 0.6              | 0.22                         |
| PTBMIL group 2 (n=50)               | IFTA score 0<br>(n=0) | IFTA score 1<br>(n=6)  | IFTA score 2<br>(n=28) | IFTA score 3<br>(n=16) | <i>P</i> for trend*          |
| Systolic blood pressure (mmHg)      |                       | 136.8 ± 13.8           | 148.6 ± 18.3           | 152.1 ± 20.4           | 0.11                         |
| Number of antihypertensive drug (n) |                       | 1.8 ± 1.2              | 2.0 ± 1.3              | 3.2 ± 1.4              | 0.02                         |
| Average arteriosclerosis score      |                       | 1.0 ± 0.6              | 1.5 ± 0.5              | 1.7 ± 0.5              | 0.02                         |
| PTBMIL group 3 (n=52)               | IFTA score 0<br>(n=0) | IFTA score 1<br>(n=0)  | IFTA score 2<br>(n=19) | IFTA score 3<br>(n=33) | <i>P</i> -value <sup>†</sup> |
| Systolic blood pressure (mmHg)      |                       |                        | 141.7 ± 19.7           | 152.4 ± 19.9           | 0.08                         |
| Number of antihypertensive drug (n) |                       |                        | 2.1 ± 1.4              | 3.1 ± 1.4              | 0.02                         |
| Average arteriosclerosis score      |                       |                        | 1.3 ± 0.6              | 1.6 ± 0.5              | 0.06                         |

Abbreviation

IFTA: interstitial fibrosis and tubular atrophy, PTBMIL: paratubular basement membrane insudative lesions

\*Tests for linear trend across IFTA scores. †P-value was calculated by Wilcoxon signed rank test.
