# Supplementary material for: Paratubular basement membrane insudative lesions predict renal prognosis in patients with type 2 diabetes and biopsy-proven diabetic nephropathy
Source: PubMed Central journal article supplement (PMC5557586; doi:10.1371/journal.pone.0183190), 2017-08-15
Supplement: pone.0183190.s006.pdf [file pone.0183190.s006.pdf]

S1 Fig A

Patients with IFTA score 1

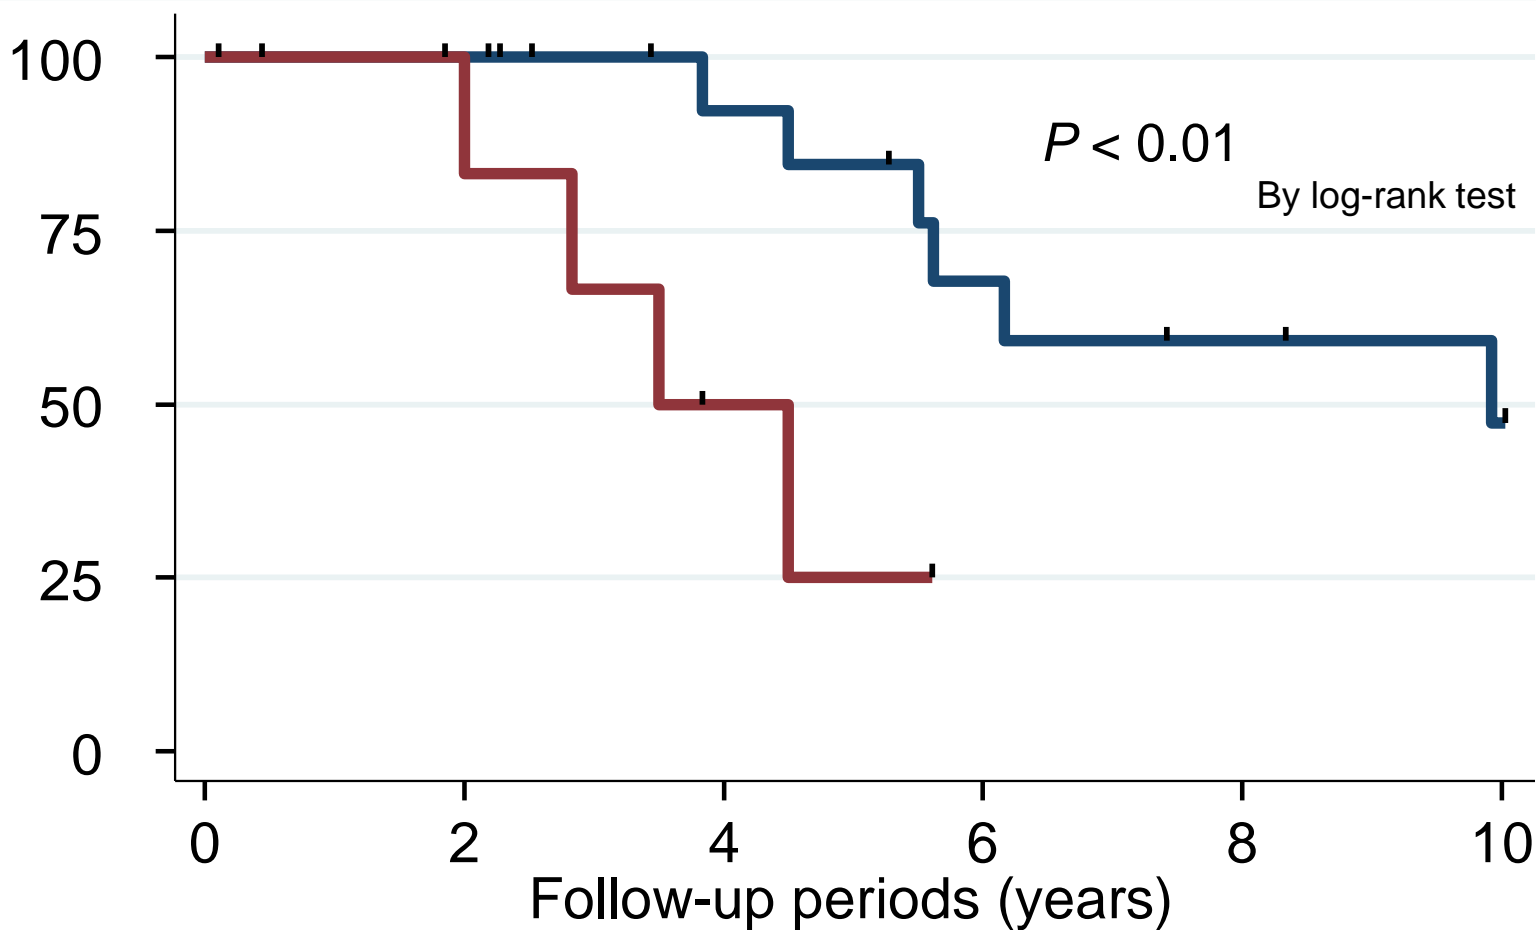

| Number at risk |    | 0  | 2  | 4 | 6 | 8 | 10 |
|----------------|----|----|----|---|---|---|----|
| PTBMIL Group 1 | 20 | 17 | 12 | 8 | 6 | 4 |    |
| PTBMIL Group 2 | 6  | 6  | 2  | 0 | 0 | 0 | 0  |

— PTBMIL Group1 (PTBMIL score 0-2)  
 — PTBMIL Group2 (PTBMIL score 3,4)

S1 Fig B

Patients with IFTA score 2

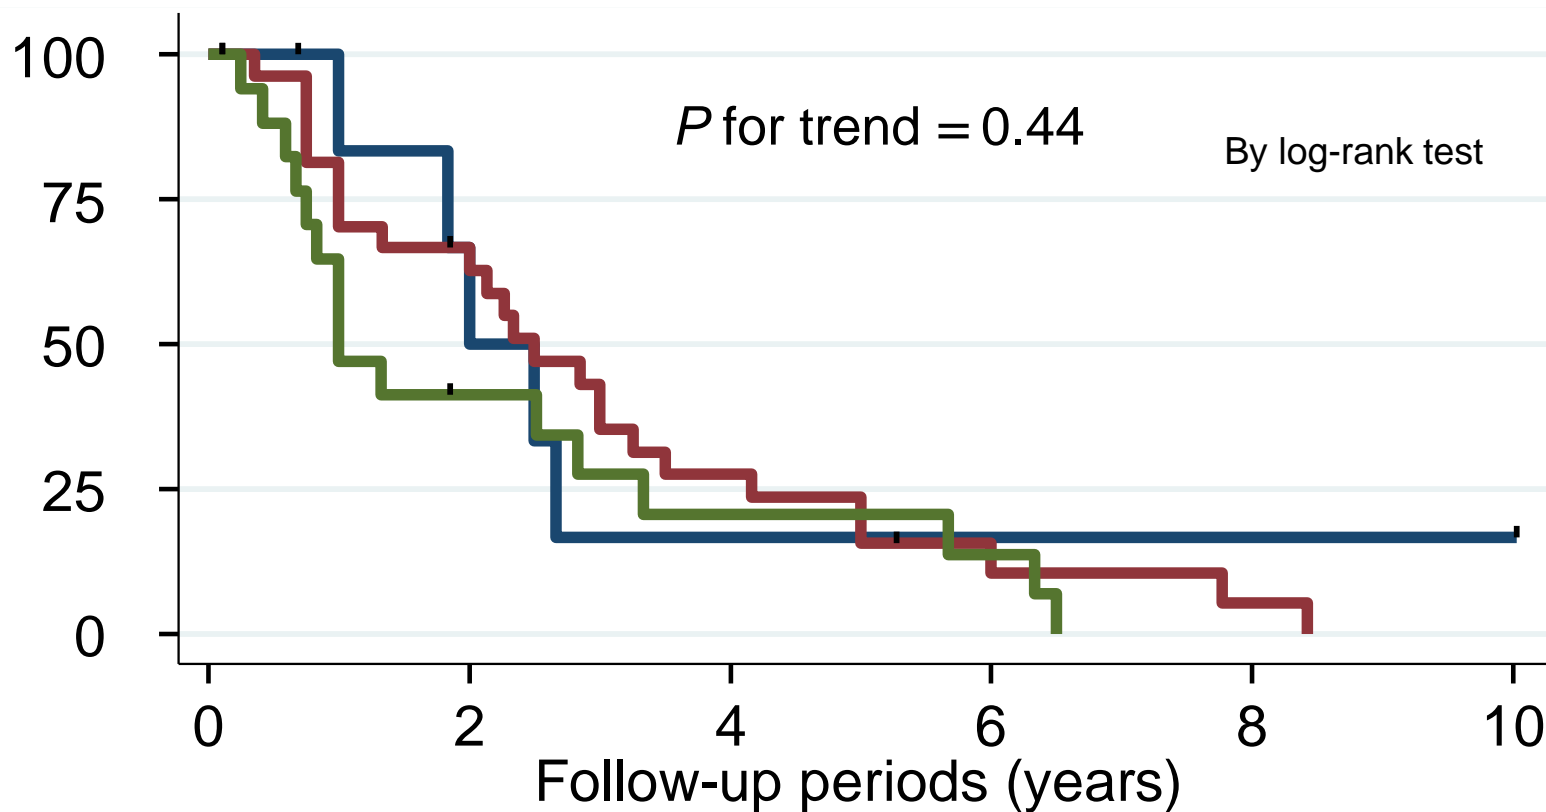

| Number at risk |    | 0  | 2 | 4 | 6 | 8 | 10 |
|----------------|----|----|---|---|---|---|----|
| PTBMIL Group 1 | 7  | 4  | 1 | 1 | 1 | 1 | 1  |
| PTBMIL Group 2 | 28 | 17 | 7 | 3 | 1 | 0 | 0  |
| PTBMIL Group 3 | 19 | 6  | 3 | 2 | 0 | 0 | 0  |

- PTBMIL Group 1 (PTBMIL score 0-2)
- PTBMIL Group 2 (PTBMIL score 3,4)
- PTBMIL Group 3 (PTBMIL score 5,6)

S1 Fig C

## Patients with IFTA score 3

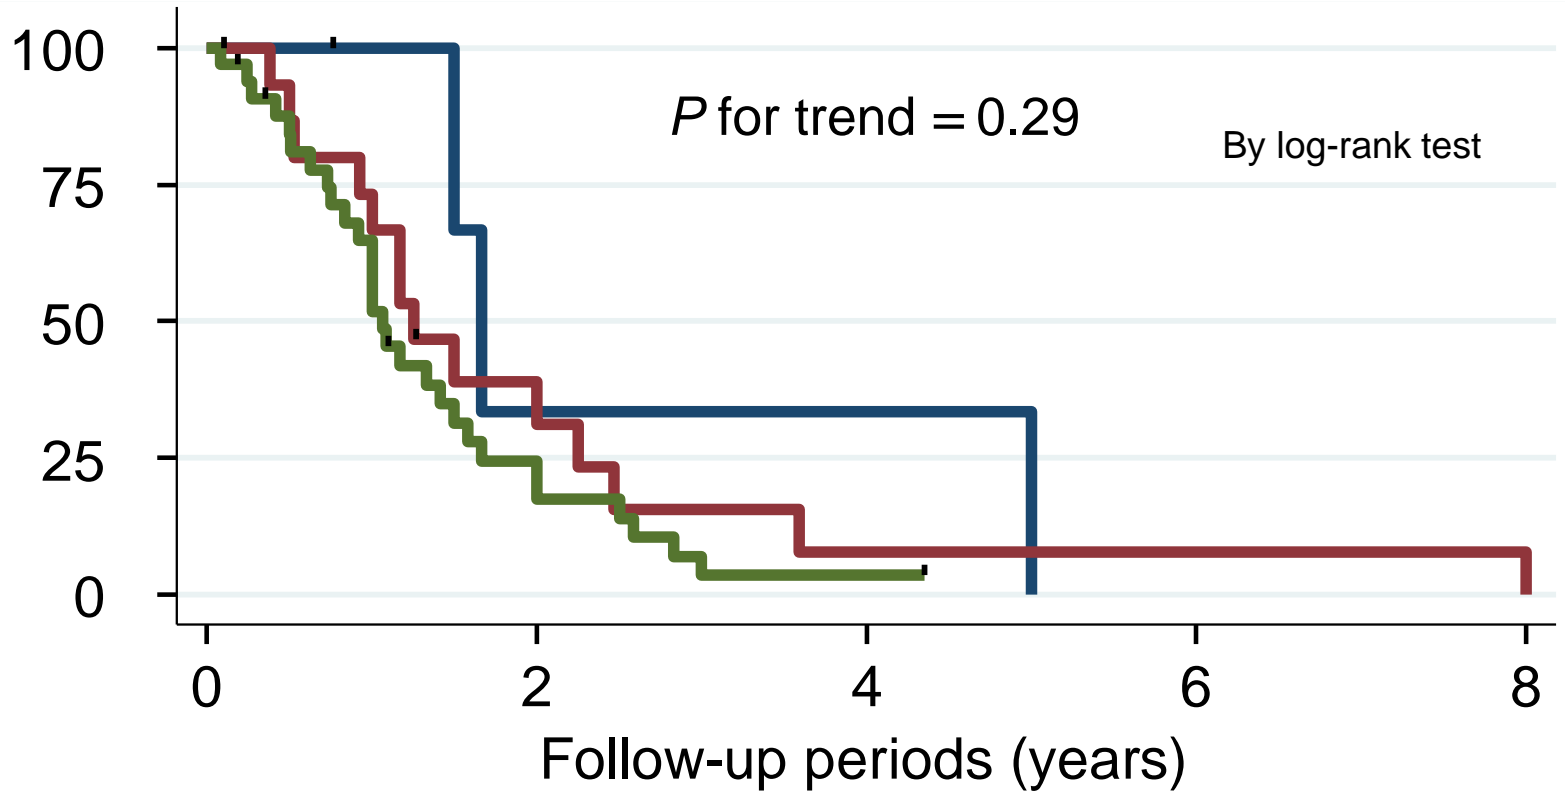

| Number at risk |    | 0 | 2 | 4 | 6 | 8 |
|----------------|----|---|---|---|---|---|
| PTBMIL Group 1 | 4  |   | 1 | 1 | 0 | 0 |
| PTBMIL Group 2 | 16 |   | 5 | 1 | 1 | 1 |
| PTBMIL Group 3 | 33 |   | 7 | 1 | 0 | 0 |

- PTBMIL Group 1 (PTBMIL score 0-2)
- PTBMIL Group 2 (PTBMIL score 3,4)
- PTBMIL Group 3 (PTBMIL score 5,6)
